# Supplementary material for: Personality traits in post-COVID syndrome
Source: Research Square preprint supplement (doi:10.21203/rs.3.rs-1099432/v1), 2021-11-22
Supplement: Supplementary file 1 [file 0ed9e93226f3851ea5abbedd.docx]

| **Supplementary Table 5.** Neuropsychiatric characteristics of the 4 personality profiles derived from cluster analysis. | | | | | |
| --- | --- | --- | --- | --- | --- |
|  | Cluster 1 | Cluster 2 | Cluster 3 | Cluster 4 | F (P value) |
| Number of patients with COVID-19/number of controls | 43 / 25 | 23 / 39 | 13 / 14 | 14 / 15 | 8.96* **(0.030)** |
| Age | 53.74 ± 9.57 | 47.43 ± 10.88 | 52.83 ± 13.40 | 43.64 ± 11.46 | 4.02 **(0.010)c** |
| Sex (women) | 29 (67.4%) | 17 (73.9%) | 8 (61.5%) | 12 (85.7%) | 2.57* (0.461) |
| BDI-II | 16.72 ± 8.77 | 10.30 ± 6.69 | 9.67 ± 7.79 | 15.77 ± 7.60 | 4.66 (**0.005)a,b** |
| STAI-S | 24.51 ± 11.11 | 13.39 ± 8.78 | 19.00 ± 12.71 | 23.50 ± 10.71 | 5.74 **(0.001)a,e** |
| STAI-T | 32.65 ± 8.28 | 22.70 ± 9.33 | 19.58 ± 12.09 | 30.86 ± 9.32 | 9.88 **(< 0.001)a,b,c,f** |
| MFIS | 55.07 ± 13.14 | 48.35 ± 17.29 | 50.67 ± 18.47 | 56.23 ± 13.42 | 1.29 (0.281) |
| PSQI | 10.07 ± 4.93 | 9.82 ± 4.87 | 8.45 ± 4.52 | 11.00 ± 4.26 | 0.59 (0.617) |
| ANOVA with Tukey post-hoc analysis showed statistically significant differences between clusters 1 and 2 (a), clusters 1 and 3 (b), clusters 1 and 4 (c), clusters 2 and 3 (d), clusters 2 and 4 (e), and clusters 3 and 4 (f).  *Chi-square test. | | | | | |

ANOVA: analysis of variance; BDI-II: Beck Depression Inventory-II; COVID-19: coronavirus disease 2019; MFIS: Modified Fatigue Impact Scale; PSQI: Pittsburgh Sleep Quality Index; STAI-S: State-Trait Anxiety Inventory, state anxiety subscale; STAI-T: State-Trait Anxiety Inventory, trait anxiety subscale.
